# Supplementary material for: Integrated information theory (IIT) 4.0: Formulating the properties of phenomenal existence in physical terms
Source: PubMed Central journal article supplement (PMC10581496; doi:10.1371/journal.pcbi.1011465), 2023-10-17
Supplement: pcbi.1011465.s003.pdf [file pcbi.1011465.s003.pdf]

# Integrated information theory (IIT) 4.0: Formulating the properties of phenomenal existence in physical terms

Larissa Albantakis<sup>1¶</sup>, Leonardo Barbosa<sup>1,2¶</sup>, Graham Findlay<sup>1,3¶</sup>, Matteo Grasso<sup>1¶</sup>, Andrew M Haun<sup>1¶</sup>, William Marshall<sup>1,4¶</sup>, William GP Mayner<sup>1,3¶</sup>, Alireza Zaeemzadeh<sup>1¶</sup>, Melanie Boly<sup>1,5</sup>, Bjørn E Juel<sup>1,6</sup>, Shuntaro Sasai<sup>1,7</sup>, Keiko Fujii<sup>1</sup>, Isaac David<sup>1</sup>, Jeremiah Hendren<sup>1,8</sup>, Jonathan P Lang<sup>1</sup>, Giulio Tononi<sup>1\*</sup>

**1** Department of Psychiatry, University of Wisconsin, Madison, Wisconsin, USA

**2** Fralin Biomedical Research Institute at VTC, Virginia Tech, Roanoke, Virginia, USA

**3** Neuroscience Training Program, University of Wisconsin, Madison, Wisconsin, USA

**4** Department of Mathematics and Statistics, Brock University, St. Catharines, Ontario, Canada

**5** Department of Neurology, University of Wisconsin, Madison, Wisconsin, USA

**6** Institute of Basic Medical Sciences, University of Oslo, Oslo, Norway

**7** Araya Inc., Tokyo, Japan

**8** Graduate School Language & Literature, Ludwig Maximilian University of Munich, Munich, Germany

¶These authors contributed equally to this work.

\* gtononi@wisc.edu

## S3 - Analytical solution for $\sum \varphi_r$ and the number of causal relations

Here, we show how the sum of the relation integrated information over all the causal relations ( $\sum \varphi_r$ ) and the number of relations can be computed without assessing the relations individually. We only need the set of causal distinctions:

$$D(\mathcal{T}_e, \mathcal{T}_c, s) = \{d(m) : m \subseteq s, \varphi_d(m) > 0, z_c^*(m) \subseteq s'_c, z_e^*(m) \subseteq s'_e\},$$

where  $d(m) = (m, z^*(m), \varphi_d(m))$  and  $z^*(m) = \{z_c^*(m), z_e^*(m)\}$ .

### Analytical computation of $\sum \varphi_r$

Given a subset of distinctions  $\mathbf{d} \subseteq D(\mathcal{T}_e, \mathcal{T}_c, s)$  with  $|\mathbf{d}| \geq 2$ , any subset  $\mathbf{z}$  of purviews that contains either the cause, or effect, or both the cause and effect of each distinction  $d \in \mathbf{d}$  and overlap congruently defines a relation face  $f$  with face overlap  $o_f^* = \bigcap_{z \in \mathbf{z}} z$ . The relation overlap is further defined as the union of the face overlaps  $\bigcup_{f \in \mathbf{f}(\mathbf{d})} o_f^*$ , where  $\mathbf{f}(\mathbf{d})$  represents the set of all the faces over the distinction set  $\mathbf{d}$ . Here, intersection and union take into account both the units and their states.

First, we can show:

$$\bigcup_{f \in \mathbf{f}(\mathbf{d})} o_f^* = \bigcap_{d \in \mathbf{d}} (z_c^*(d) \cup z_e^*(d)),$$

by proving any unit  $n$  in  $\bigcup_{f \in \mathbf{f}(\mathbf{d})} o_f^*$  is in  $\bigcap_{d \in \mathbf{d}} (z_c^*(d) \cup z_e^*(d))$  and vice versa:

$$\begin{aligned} n \in \bigcup_{f \in \mathbf{f}(\mathbf{d})} o_f^* &\iff \exists f \in \mathbf{f}(\mathbf{d}), n \in o_f^* \iff \forall d \in \mathbf{d}, n \in z_c^*(d) \text{ or } n \in z_e^*(d) \\ &\iff \forall d \in \mathbf{d}, n \in z_c^*(d) \cup z_e^*(d) \iff n \in \bigcap_{d \in \mathbf{d}} (z_c^*(d) \cup z_e^*(d)) \end{aligned}$$

This helps us to rewrite the relation integrated information of a set of distinctions  $\mathbf{d} \subseteq D(\mathcal{T}_e, \mathcal{T}_c, s)$  with  $|\mathbf{d}| \geq 2$  as:

$$\left| \bigcap_{d \in \mathbf{d}} (z_c^*(d) \cup z_e^*(d)) \right| \min_{(z_d, \varphi_d) \in \mathbf{d}} \frac{\varphi_d}{|z_c^*(d) \cup z_e^*(d)|}.$$

We further define the set of  $z_c^*(d) \cup z_e^*(d)$  of all distinctions in  $D$  and their corresponding distinction integrated information as:

$$\mathcal{Z}(\mathcal{T}_e, \mathcal{T}_c, s) = \{(z_c^*(m) \cup z_e^*(m), \varphi(m)) : (m, z^*(m), \varphi_d(m)) \in D(\mathcal{T}_e, \mathcal{T}_c, s)\}.$$

Now, given a single node  $n$  in a specific state, we can find all the distinctions that contain  $n$  in that state in their cause, or effect, or both purviews as:

$$\mathcal{Z}(n) = \{(z, \varphi) : (z, \varphi) \in \mathcal{Z}(\mathcal{T}_e, \mathcal{T}_c, s), n \in z\}. \quad (1)$$

Any subset of  $\mathcal{Z}(n)$  of size 2 or larger defines a relation whose overlap contains at least  $n$ . Formally, for  $\mathbf{r} \subseteq \mathcal{Z}(n)$ ,  $|\mathbf{r}| \geq 2$ , there exists a relation with relation purview  $\bigcap_{(z_d, \varphi_d) \in \mathbf{r}} z_d$  and integrated information value of:

$$\left| \bigcap_{(z_d, \varphi_d) \in \mathbf{r}} z_d \right| \min_{(z_d, \varphi_d) \in \mathbf{r}} \frac{\varphi_d}{|z_d|}.$$

Note that, by definition of  $\mathcal{Z}(n)$  and  $\mathcal{Z}(\mathcal{T}_e, \mathcal{T}_c, s)$ ,  $z_d$  is the union of cause and effect purviews. Using the definition of  $\mathcal{Z}(\mathcal{T}_e, \mathcal{T}_c, s)$  and  $\mathcal{Z}(n)$ , we can write the sum of the integrated information of relations, except self-relations, as

$$\sum_{\substack{\mathbf{r} \subseteq \mathcal{Z}(\mathcal{T}_e, \mathcal{T}_c, s) \\ |\mathbf{r}| \geq 2}} \left| \bigcap_{(z_d, \varphi_d) \in \mathbf{r}} z_d \right| \min_{(z_d, \varphi_d) \in \mathbf{r}} \frac{\varphi_d}{|z_d|} = \sum_{n \in s'_c \cup s'_e} \sum_{\substack{\mathbf{r} \subseteq \mathcal{Z}(n) \\ |\mathbf{r}| \geq 2}} \min_{(z_d, \varphi_d) \in \mathbf{r}} \frac{\varphi_d}{|z_d|},$$

By factoring the sum over  $\mathbf{r} \subseteq \mathcal{Z}(\mathcal{T}_e, \mathcal{T}_c, s)$  into two sums over the nodes  $n$  and the relations whose purview contains *at least*  $n$ ,  $\mathbf{r} \subseteq \mathcal{Z}(n)$ ,  $|\mathbf{r}| \geq 2$ , we are overcounting each relation by a factor of its joint purview size  $\left| \bigcap_{(z_d, \varphi_d) \in \mathbf{r}} z_d \right|$ . For example, if a set of distinctions make up a relation  $\mathbf{r}$  over two units  $n_1$  and  $n_2$ , they all are members of both  $\mathcal{Z}(n_1)$  and  $\mathcal{Z}(n_2)$ . Therefore,  $\mathbf{r} \subseteq \mathcal{Z}(n_1)$  and  $\mathbf{r} \subseteq \mathcal{Z}(n_2)$ . This simplifies the summand to just  $\min_{(z_d, \varphi_d) \in \mathbf{r}} \frac{\varphi_d}{|z_d|}$ . To compute the inner sum, we can sort the distinctions in  $\mathcal{Z}(n)$  by their  $\frac{\varphi}{|z|}$  value in a non-decreasing order, such that  $(z_{(1)}, \varphi_{(1)})$  has the summary est  $\frac{\varphi}{|z|}$  ratio,  $(z_{(2)}, \varphi_{(2)})$  has the second smallest  $\frac{\varphi}{|z|}$  ratio, and so on. Then, we can compute the sum as:

$$\sum_{\substack{\mathbf{r} \subseteq \mathcal{Z}(n) \\ |\mathbf{r}| \geq 2}} \min_{(z_d, \varphi_d) \in \mathbf{r}} \frac{\varphi_d}{|z_d|} = \sum_{j=1}^{|\mathcal{Z}(n)|} \frac{\varphi_{(j)}}{|z_{(j)}|} (2^{|\mathcal{Z}(n)|-j} - 1).$$

In words, any subset  $\mathbf{r} \subseteq \mathcal{Z}(n)$ ,  $|\mathbf{r}| \geq 2$ , that contains  $(z_{(1)}, \varphi_{(1)})$  will have  $\min_{(z_d, \varphi_d) \in \mathbf{r}} \frac{\varphi_d}{|z_d|} = \frac{\varphi_{(1)}}{|z_{(1)}|}$ . There are  $2^{|\mathcal{Z}(n)|-1} - 1$  of such subsets. Similarly, there are  $2^{|\mathcal{Z}(n)|-2} - 1$  subsets that contain  $(z_{(2)}, \varphi_{(2)})$ , but not  $(z_{(1)}, \varphi_{(1)})$ , etc. This helps us arrive at our final results:

$$\sum_{\substack{\mathbf{r} \subseteq \mathcal{Z}(\mathcal{T}_e, \mathcal{T}_c, s) \\ |\mathbf{r}| \geq 2}} \left| \bigcap_{(z_d, \varphi_d) \in \mathbf{r}} z_d \right| \min_{(z_d, \varphi_d) \in \mathbf{r}} \frac{\varphi_d}{|z_d|} = \sum_{n \in s'_c \cup s'_e} \sum_{j=1}^{|\mathcal{Z}(n)|} \frac{\varphi(j)}{|z(j)|} (2^{|\mathcal{Z}(n)|-j} - 1).$$

This gives us the sum of the relation integrated information of all the relations, except the self-relations, i.e.  $|\mathbf{r}| = 1$ . The self-relations can be assessed individually without combinatorial explosion.

### Analytical count of the number of relations

We can also count all the causal relations among all the distinctions in  $D(\mathcal{T}_e, \mathcal{T}_c, s)$  by generalizing the definition of  $\mathcal{Z}(n)$  in (1) to all the subsets  $o \subseteq s'_c \cup s'_e$ :

$$\mathcal{Z}(o) = \{(z, \varphi) : (z, \varphi) \in \mathcal{Z}(\mathcal{T}_e, \mathcal{T}_c, s), z \supseteq o\}.$$

For each distinction  $d \in D(\mathcal{T}_e, \mathcal{T}_c, s)$ , there is a corresponding element  $((z_c^*(d) \cup z_e^*(d), \varphi(d))$  in  $\mathcal{Z}(o)$  if  $o \subseteq z_c^*(d) \cup z_e^*(d)$ . Any subset of  $\mathcal{Z}(o)$  of size 2 or larger defines a relation whose overlap contains at least  $o$ . The number of such subsets is:

$$2^{|\mathcal{Z}(o)|} - |\mathcal{Z}(o)| - 1.$$

We can count all the relations by applying the inclusion-exclusion principle (from combinatorics) as:

$$\sum_{o \subseteq s'_c \cup s'_e} (-1)^{|o|-1} (2^{|\mathcal{Z}(o)|} - |\mathcal{Z}(o)| - 1).$$

This is the number of all the causal relations among the causal distinctions in  $D(\mathcal{T}_e, \mathcal{T}_c, s)$ , except the self-relations. Again, the self-relations can be counted individually without combinatorial explosion.
